1 **The influence of anatomical shape variations of wrist bones on kinematic parameter**  
2 **extraction in CT scans**

3

4 Maranda Haenen<sup>1,2,3</sup>, Stefan Hummelink<sup>2</sup>, Eline Karstanje<sup>4</sup>, Ioannis Sechopoulos<sup>3,4,5</sup>, Brigitte  
5 van der Heijden<sup>1,2</sup>

6

7 **Affiliations**

8 <sup>1</sup> Department of Plastic and Reconstructive Surgery, Radboud University Medical Centre,  
9 Nijmegen, the Netherlands

10 <sup>2</sup> Department of Plastic and Reconstructive Surgery, Jeroen Bosch Hospital, 's-  
11 Hertogenbosch, the Netherlands

12 <sup>3</sup> Department of Medical Imaging, Radboud University Medical Centre, Nijmegen, the  
13 Netherlands

14 <sup>4</sup> Technical Medicine Center, University of Twente, Enschede, the Netherlands

15 <sup>5</sup> Dutch Expert Centre for Screening (LRCB), Nijmegen, the Netherlands

16

17 **Email addresses all Authors in consecutive order:**

18 [maranda.haenen@radboudumc.nl](mailto:maranda.haenen@radboudumc.nl); [stefan.hummelink@radboudumc.nl](mailto:stefan.hummelink@radboudumc.nl);

19 [e.karstanje@student.utwente.nl](mailto:e.karstanje@student.utwente.nl); [ioannis.sechopoulos@radboudumc.nl](mailto:ioannis.sechopoulos@radboudumc.nl);

20 [brigitte.vanderheijden@radboudumc.nl](mailto:brigitte.vanderheijden@radboudumc.nl)

21

22 **Corresponding Author: Maranda Haenen**

23 Department of Plastic, Reconstructive, and Hand Surgery;

24 Radboud University Medical Center

25 Geert Grooteplein Zuid 10, 6525 GA Nijmegen, The Netherlands

26 Email: maranda.haenen@radboudumc.nl

27 **Ethics Statements:** All subjects gave informed consent for inclusion before participating in  
28 the study. The study was conducted in accordance with the Declaration of Helsinki, and the  
29 protocol was approved by the Ethics Committee (ABR Number: NL72518.091.19 and  
30 NL84487.091.23)

31 **Keywords**

32 *Statistical shape model, 4DCT, 3D, wrist, scapho-lunate ligament injury*

33

34 **Abstract**

35 **Introduction:** Four-Dimensional Computed Tomography (4DCT) shows promise in diagnosing  
36 wrist pathologies such as scapholunate ligament lesions (SLL). Two parameters indicative of  
37 SLL lesions in these scans, the scapholunate angle (SLA) and the capitulate angle (CLA),  
38 might be affected by anatomical shape variations. Therefore, this study characterizes the  
39 impact of anatomical shape variations on SLA and CLA estimates from 4DCT scans.

40 **Methods:** 3D CT images retrieved from 4DCT scans of healthy wrists were used. Scans were  
41 automatically segmented using an Artificial Intelligence-based algorithm. A statistical shape  
42 model (SSM) was created for each bone separately. The quality of each SSM was assessed  
43 using a leave-one-out approach by calculating the root mean squared error (RMSE). Next,  
44 local coordinate systems (LCSs) were assigned to the SSMs while shape variations were  
45 introduced. The rotational deviation of the LCSs was calculated by a combined rotation  
46 around the three axes. Finally, the SLAs and CLAs were calculated for all possible bone shape  
47 combinations.

48 **Results:** SSMs of the carpal bones and radius were created using 106 and 99 scans,  
49 respectively, with a maximum RMSE across all SSMs of 0.65 mm. The 95<sup>th</sup> percentile of the  
50 rotational deviations of the LCSs of the carpal bones and radius were below 3°. The resulting  
51 uncertainty due to anatomical variations in the calculation of the SLA and CLA was 2-3°.

52 **Conclusion:** Anatomical shape variations hardly influence the SLA, CLA, and LCSs of the  
53 carpal bones and radius so the methods to estimate the LCSs can be used to estimate  
54 relevant kinematic parameters in 4DCT scans.

55

## 56 Introduction

57 Wrist injuries, like scapholunate ligament (SLL) lesions, might cause abnormal kinematics of  
58 the wrist joint, which progress to osteoarthritis if left untreated. However, due to the  
59 complexity of the wrist joint, composed of eight carpal bones, two forearm bones, and  
60 multiple extrinsic and intrinsic ligaments, an accurate diagnosis of pathology is often  
61 challenging (1-4).

62 Four-Dimensional Computed Tomography (4DCT) is a promising new dynamic imaging  
63 modality for evaluating wrist pathologies associated with a kinematic change. In 4DCT,  
64 multiple 3D CT scans are acquired sequentially while the wrist is in motion. This non-invasive  
65 dynamic imaging technique with high spatial and temporal resolution allows for quantifying  
66 wrist kinematics (5-7) and has been shown to have potential value in diagnosing SLL injuries  
67 (8-11).

68 The diagnosis of an SLL injury in 4DCT currently relies on detecting pathologic changes in the  
69 angles between the carpal bones, like the scapholunate angle (SLA) and capitolunate angle  
70 (CLA) (12, 13). To determine the SLA, CLA, and other intercarpal angles in 3D images, a  
71 unique local coordinate system (LCS) for each bone is needed. It is essential, therefore, to  
72 develop an objective and repetitive algorithm to define the LCSs in the 3D CT images so that  
73 the angle estimations are consistent and comparable across scans. However, anatomical  
74 variations might affect the definition of the corresponding LCSs and influence the derived  
75 kinematic parameters like the intercarpal angles, leading to unreliable comparative analysis  
76 across subjects. Therefore, an objective quantitative approach is needed to characterize the  
77 size of the effect of anatomic variations on the corresponding LCSs and, subsequently, on the  
78 kinematic parameters derived from the 3D images of the 4DCT scans.

79 A statistical shape model (SSM) is a frequently used mathematical representation of the  
80 average anatomical shape and its variability of any anatomic part of interest within a given  
81 dataset (14-17). By assigning LCSs to an SSM, modelled to the most prominent shape  
82 variations, the effect of the naturally occurring anatomical variations on the automatic LCS  
83 placement within the wrist can be investigated. The variations of the subsequently  
84 calculated angles result in an upper limit of the accuracy of the estimations of these angles.  
85 Therefore, any detectable pathology must introduce angular variations larger than this  
86 number.

87 Therefore, the overall aim of this study is to determine the effect of natural bone shape  
88 variations on the accuracy of SLA and CLA estimates. Thus, new methods are introduced to  
89 automatically identify LCSs within the radius, scaphoid, capitate, and lunate; a necessary first  
90 step to determine the angles. Then, the impact of anatomical shape variations on these LCSs  
91 is assessed, quantifying their subsequent effects on the SLA and CLA estimates.

## 92 **Methods**

93 A dataset of 3D CT images retrieved from 4DCT scans of healthy wrists was used to  
94 investigate the influence of anatomical shape variations on the orientation of LCSs. For this,  
95 an SSM was created for each bone separately and then used to quantify the anatomical  
96 variations in the set. Next, LCSs were assigned to the shape models while shape variations  
97 were introduced to simulate the effect of anatomical variation on the orientation of the LCSs  
98 and the carpal angle calculations. Figure 1 shows a flowchart of the followed methodology.

## 99 Dataset

100 The dominant hand of healthy subjects and contralateral healthy wrists of patients with no  
101 history of wrist trauma was scanned in the RadboudUMC using a clinical 320-channel CT

102 system (Aquilion ONE Prism, Canon Medical Systems, Otawara, Japan). Ethical approval was  
103 given by the local ethical committee (ABR Number: NL72518.091.19 and NL84487.091.23).  
104 Out of the entire 4DCT scan for this study, only the initial 3D scan, during which the wrists  
105 were held static, was extracted. Scans were acquired with a helical scan, collimation 0.5 x 80  
106 mm, pitch 0.637, rotation time 0.5 s, tube voltage 80 kV, and tube current determined  
107 automatically per patient by setting the automatic exposure control to achieve an SD of 20.  
108 Scans were reconstructed using an adaptive iterative reconstruction algorithm (AIDR 3D,  
109 Canon Medical Systems), and the average reconstructed voxel dimensions were 0.44 mm x  
110 0.44 mm x 0.35 mm. The scans were automatically segmented using the AI algorithm  
111 created by Teule et al. and stored as surface meshes (18).

112

### 113 Statistical Shape Model

114 The SSM was created for every bone separately using identical steps. The segmented  
115 meshes were re-meshed using anisotropic remeshing to improve mesh quality and  
116 downsampled (10000 vertices for the radius, 3000 for the carpal bones) using commercial  
117 software (MATLAB version: 9.13.0 (R2022b), The MathWorks Inc., Natick, Massachusetts). All  
118 meshes were registered and scaled to the position and overall size of their corresponding  
119 bone (i.e., radius, scaphoid, lunate, and capitate) of one randomly chosen wrist using a rigid  
120 coherent point drift (CPD) algorithm (19). Principal component analysis (PCA) was performed  
121 to identify the main variation modes, now referred to as principal components (PC) in the  
122 dataset, expressing each shape as a linear combination of these PCs. A leave-one-out  
123 approach was used to determine the generalization ability of the model. The SSM was  
124 created  $n_{\text{samples}}$  times, excluding one different sample from the set on each iteration. Then,  
125 the generalization ability was calculated by fitting the SSM to the one left-out sample and

126 determining the root mean square error (RMSE). The fitting was repeated by progressively  
127 increasing the number of PCs included, starting with the first PC only and finally using all PCs.  
128 New shape meshes were created by setting the values of all PCs to their mean and then  
129 varying one at a time by changing the value of the PC from  $-2\sigma$  to  $+2\sigma$  in  $0.2\sigma$  steps.

130

### 131 Local coordinate systems and carpal angles

132 For the new shapes obtained from the previous step, unique LCSs were determined using  
133 different algorithms for each bone. Subsequently, the SLA and CLA were calculated. All  
134 algorithms are developed in MATLAB; a more detailed description is provided below.

135

#### 136 *Radius*

137 The LCS of the radius was established using inertia tensor calculations and eigenvector  
138 analysis using the method described by de Roo et al. (20). The origin of the LCS was  
139 established between the scaphoid and lunate fossae. The long axis of the radius was defined  
140 as the z-axis of the LCS. The x-axis was set to pass through the radial styloid, which was  
141 projected onto a plane orthogonal to the z-axis, and the y-axis was defined as the cross  
142 product of the z- and x-axis, pointing in a volar direction.

143

#### 144 *Scaphoid*

145 The LCS of the scaphoid was established using PCA and the direction vector of the three  
146 principal components as the direction vectors of the LCS. The first principal component  
147 passed through the proximal and distal poles of the scaphoid. The origin of the LCS was  
148 defined as the centre-of-mass (COM) of the scaphoid. To uniformly define the positive axes,  
149 the directions of the axes were corrected using the LCS determined for the radius.

150

151 *Lunate*

152 The LCS of the lunate was established using the two lunate cornua as landmarks. The x-axis  
153 passes from the COM of the lunate perpendicular to the line between the two cornua. A 2D  
154 plane was constructed using COM and two landmarks. The y-axis was defined as the normal  
155 vector of that plane. The z-axis was defined as the cross-product of the x and y axes. The  
156 origin of the LCS was defined as the COM of the lunate.

157

158 *Capitate*

159 For the LCS of the capitate, a sphere was fitted in its proximal half. The x-axis was defined as  
160 the direction from the centre of the sphere towards the COM of the capitate. For the y-axis,  
161 the normal plane of the first direction vector was defined. Subsequently, a PCA was  
162 performed on all vertices of the capitate, and the direction vector of the second principal  
163 component was projected on the normal plane of the x-axis. The z-axis was defined as the  
164 cross-product of the x- and y-axis. The origin of the LCS was defined as the COM of the  
165 capitate.

166

167 Rotation of local coordinate systems

168 An LCS was determined for the mean shape of each bone, and all newly created shapes were  
169 transformed to that coordinate system. LCSs were determined for the new shapes, and the  
170 direction vectors were considered a rotation matrix from the mean shape to the new shape,  
171 making the mean shape the reference shape. This rotation matrix can be described as a  
172 rotation around the z-axis ( $\Delta\phi_z$ ) followed by a rotation around the y-axis ( $\Delta\phi_y$ ), and a



173 rotation around the x-axis ( $\Delta\varphi_x$ ), in that order. The total rotational deviation is then given

174 by  $\Delta\varphi_{total} = \sqrt{\Delta\varphi_z^2 + \Delta\varphi_y^2 + \Delta\varphi_x^2}$ .

175 Carpal angle range

176 The SLA and CLA were calculated for all possible combinations using the new capitae,

177 scaphoid and lunate shapes. The sagittal plane was defined as the plane constructed by the

178 y- and z-axis of the LCS in the mean shape of the radius.

179

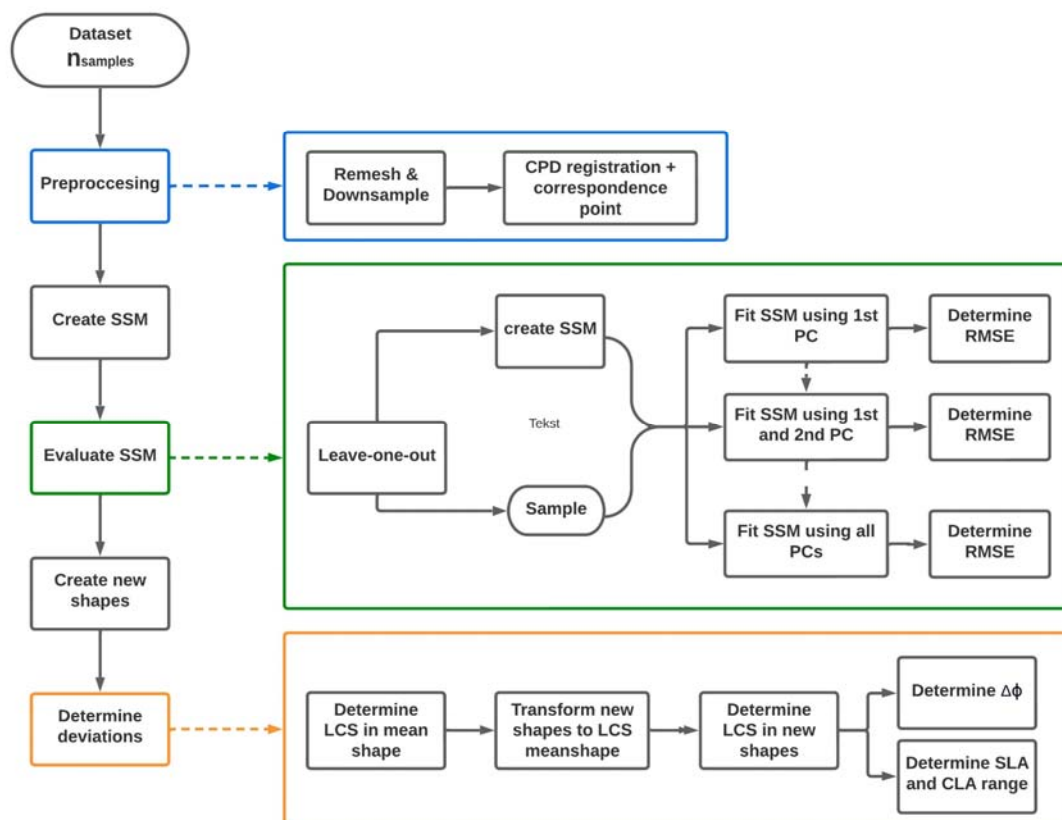

**Figure 1:** flowchart of the followed methodology. In the blue rectangle is a more detailed explanation of the preprocessing of the data, in the green one a more detailed explanation on how the quality of the SSM was assessed, and in the orange one a more detailed explanation on how the rotational error was determined.

182 **Results**

183 Dataset

184 In total, 106 wrists from 106 subjects were scanned (52% female, 72% right wrists, age range  
185 [18y – 64y]). In seven scans, the proximal part of the radius was outside the field of view  
186 (FOV), leading to exclusion from the SSM model of the radius. This resulted in  $n_{\text{samples}} = 99$  for  
187 the radius and  $n_{\text{samples}} = 106$  for the scaphoid, lunate, and capitate.

188

189 Statistical shape model

190 For every SSM, the total number of PCs, the number of PCs to describe 95% of the shape  
191 variances, and the minimal RMSE are shown in Table 1. The complete quality metrics of the  
192 SSMs are shown in Figure S1 in the online supplements.

193

**Table 1:** Quality metrics of the statistical shape models for all four bones.

| Bone     | Total number of PCs | Number of PCs<br>describing 95% variance | RMSE [mm] |
|----------|---------------------|------------------------------------------|-----------|
| Radius   | 98                  | 74                                       | 0.65      |
| Scaphoid | 105                 | 79                                       | 0.35      |
| Lunate   | 105                 | 82                                       | 0.27      |
| Capitate | 105                 | 83                                       | 0.39      |

Abbreviations: PC, principal component; RMSE, Root Mean Square Error.

194

195

196

197 Local coordinate systems and carpal angles

198 All four bones with LCS and the definition of the carpal angles are depicted in Figure 2.

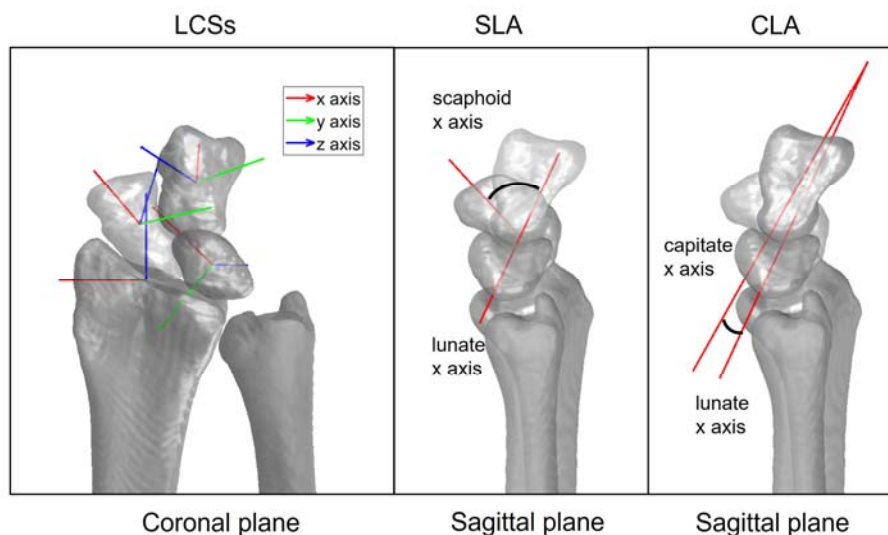

**Figure 2:** Local coordinate systems determined for the 3D images of the radius, scaphoid, lunate, and capitate depicted in an anteroposterior view/coronal plane (left) and the definition of the carpal angles SLA (middle) and CLA (right) in the sagittal plane.

199

200 Rotation of local coordinate system

201 The median and 95<sup>th</sup> percentile confidence interval (CI) of the for the four bones are

202 given in Table 2. Rotational deviations are very low for the three carpal bones and the

203 radius. The per principal component can be seen in Figure 3 and the separate

204 rotations around each axis , , and can be seen in Figure S2, both in the online

205 supplements. The new shapes and LCSs determined for them can also be seen in the videos

206 S1-4 included in the online supplement.

**Table 2:** Rotational deviation of the local coordinate systems for all four bones.

| Bone     | [°]                          |
|----------|------------------------------|
|          | median [95 <sup>th</sup> CI] |
| Radius   | 0.32 [0.04 3.35]             |
| Scaphoid | 0.03 [0.01 0.84]             |
| Lunate   | 1.25 [0.47 2.12]             |
| Capitate | 0.11 [0.04 1.40]             |

207

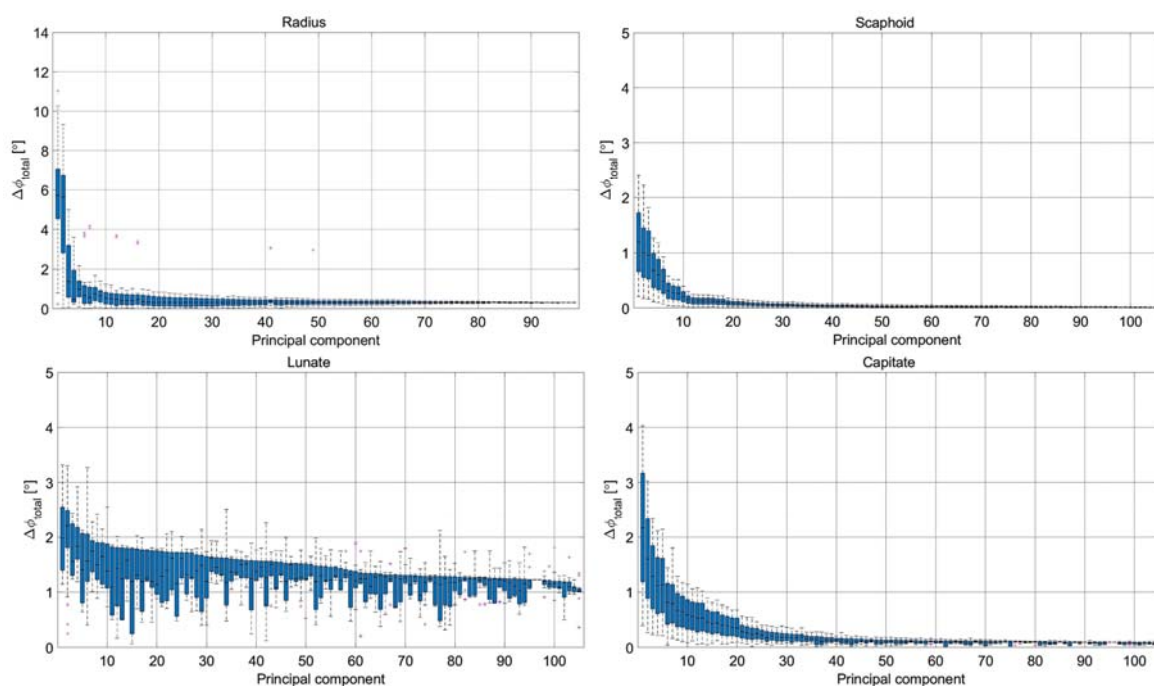

**Figure 3:** Visualization of the influence of anatomical variation on the calculated LCSs in the radius, scaphoid, lunate, and capitate. The figure shows the rotations of the LCS on the perturbed anatomy of the corresponding principal component\* with respect to the coordinate system of the mean shape.\*\*

\* the principal components are ordered based on the (left to right from high-to-low error)

\*\* the limits of the y-axis are different for the graph of the radius

208

209

210

211 Carpal angle range

212 For the carpal bones, 2,100 new shapes were created per bone, resulting in over four million  
213 possible scaphoid-lunate and capitate-lunate combinations. The SLA and CLA range and  
214 distributions are shown in histograms in Figure 4, together with the corresponding median  
215 and 95<sup>th</sup> percentile CI. Both the SLA and CLA range are narrow, below 3°.

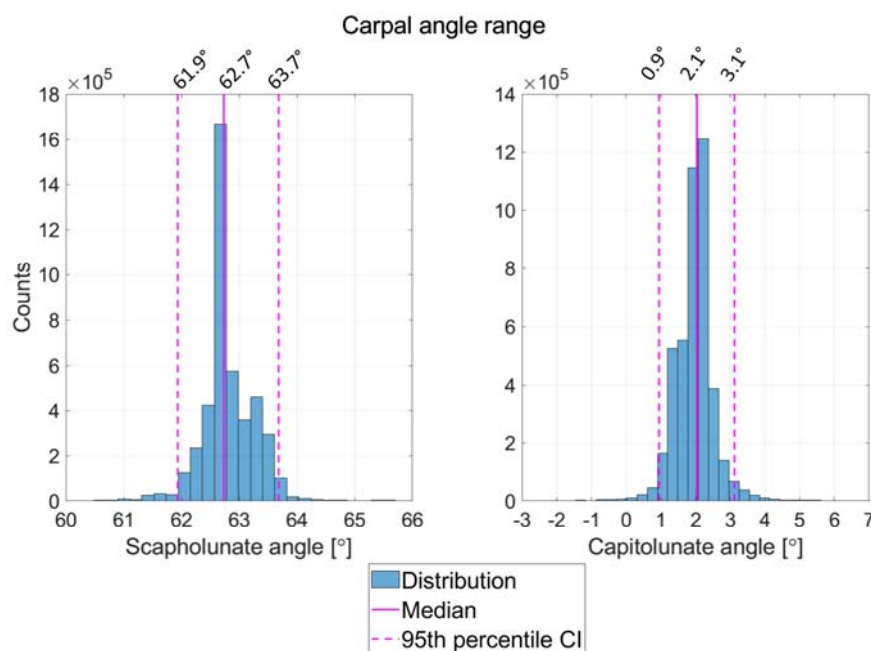

**Figure 4:** Distributions of the carpal angles calculated in over four million possible scaphoid-lunate and capitate-lunate combinations.

216  
217

## 218 Discussion

219 Several studies have demonstrated the potential value of 4DCT in diagnosing wrist injuries  
220 like SLL lesions. An automated assessment of kinematic parameters such as carpal angles is  
221 essential for 4DCT to be clinically feasible. For the calculation of the carpal angles in 3D  
222 images, LCSs for the carpal bone of interest must be defined. This study developed a method  
223 to automatically determine LCSs, followed by calculating carpal angles (SLA and CLA) of wrist  
224 bones. In addition, the influence of anatomical shape variations on the LCSs and the carpal  
225 angles was investigated.

226 Our findings show that the range of possible variation in the carpal angle estimations due to  
227 normal bone shape variability for the SLA and CLA was within 2-3°. This means that  
228 anatomical variations do not significantly influence the extraction of these kinematic  
229 parameters using the proposed LCSs. This is important in the future when comparing healthy  
230 wrists to pathological wrists. As expected, the median values for SLA and CLA are within the  
231 reference values of healthy wrists found in the literature since the radiology guidelines were  
232 considered when creating the algorithms to determine the LCSs (2). Furthermore, our  
233 findings suggest that LCSs defined in the scaphoid, lunate, and capitate are relatively  
234 insensitive to anatomical shape variations, with deviations in  $\Delta\varphi_{total}$  below 3° (95<sup>th</sup>  
235 percentile CI) and 5° overall. The radius results presented in Table 2 are similar to those of  
236 the carpal bones. However, in Figure 3, it can be seen that two out of 98 PCs result in larger  
237 deviations, with a maximum of 11°, which occur primarily around the z axis. These two PCs  
238 represent the torsion of the bone in terms of anatomical shape variations. Rotation of the  
239 LCSs in those cases was therefore expected.

240 All SSMs were considered of adequate quality. The literature presents comparable outcomes  
241 in evaluating the quality metrics and generalization ability of the radius, scaphoid, and lunate  
242 SSMs (14-16, 21). No comparative analysis was identified regarding the capitate, but the  
243 results obtained here align with those observed for the other two carpal bones.

244 One limitation of the study is the potential lack of realism of the bone shapes generated to  
245 determine the resulting variability in the LCSs and estimated SLAs and CLAs. This limitation is  
246 a result of two simplifications; that each individual bone shape was modified by varying the  
247 value of one PC at a time, and that the PC values of each bone in one wrist are independent  
248 of each other. However, this limitation probably resulted in more extreme shape variations  
249 than those that would actually be encountered, therefore testing the methodology in a  
250 worst-case scenario. Even in these extreme shapes and extreme shape combinations of the  
251 bones the SLA and CLA do not vary substantially.

252 The method to automatically determine LCSs developed in this study is the first step in  
253 analysing the effect of anatomic variation in bones on wrist kinematics determined in 4DCT-  
254 obtained images. For now, it was decided to capture all shape variations of the lunate in one  
255 model to keep it compact. However, numerous studies have underscored the impact of the  
256 lunate type on wrist kinematics. In the future it could be interesting to differentiate between  
257 the two types in this shape analysis (22, 23). Moreover, it might be interesting to assess the  
258 effect of anatomical shape variations on different methods of determination of LCSs, for  
259 example, the one proposed by Coburn et al. (24).

260 In conclusion, we developed a method to extract LCSs of wrist bones and estimated relevant  
261 kinematic parameters in 4DCT scans. This study showed that the anatomical shape variations  
262 hardly influence the SLA and CLA extraction that depend on the LCS estimations. The LCS



263 determined in the radius is sensitive to rotations around the z axis due to the bone torsion,  
264 as expected, but is hardly influenced by other shape variations. The impact of this depends  
265 on the kinematic parameter of interest.

266 **References**

- 267 1. Chantelot C. Post-traumatic carpal instability. *Orthopaedics & Traumatology: Surgery*  
268 *& Research*. 2014;100(1):S45-S53.
- 269 2. Andersson JK. Treatment of scapholunate ligament injury: Current concepts. *EFORT*  
270 *Open Reviews*. 2017;2(9):382-93.
- 271 3. Mirghasemi AR, Lee DJ, Rahimi N, Rashidinia S, Elfar JC. Distal Radioulnar Joint  
272 Instability. *Geriatr Orthop Surg Rehabil*. 2015;6(3):225-9.
- 273 4. Rodríguez-Merchán EC, Shojaie B, Kachooei AR. Distal Radioulnar Joint Instability:  
274 Diagnosis and Treatment. *Arch Bone Jt Surg*. 2022;10(1):3-16.
- 275 5. Zhao K, Breighner R, Holmes D, III, Leng S, McCollough C, An K-N. A Technique for  
276 Quantifying Wrist Motion Using Four-Dimensional Computed Tomography: Approach and  
277 Validation. *Journal of Biomechanical Engineering*. 2015;137(7).
- 278 6. White J, Couzens G, Jeffery C. The use of 4D-CT in assessing wrist kinematics and  
279 pathology. *The Bone & Joint Journal*. 2019;101-B(11):1325-30.
- 280 7. Teule EHS, Hummelink S, Kumaş A, Buckens CFM, Sechopoulos I, van der Heijden EPA.  
281 Automatic analysis of the scapholunate distance using 4DCT imaging: normal values in the  
282 healthy wrist. *Clinical Radiology*. 2024;79(8):e1040-e8.
- 283 8. Demehri S, Hafezi-Nejad N, Morelli JN, et al. Scapholunate kinematics of  
284 asymptomatic wrists in comparison with symptomatic contralateral wrists using four-  
285 dimensional CT examinations: initial clinical experience. *Skeletal Radiology*. 2016;45(4):437-  
286 46.
- 287 9. Granero J, Orkut S, Rauch A, et al. Correlation Between Dynamic 4-Dimensional  
288 Computed Tomography Data and Arthroscopic Testing of Scapholunate Instability: A  
289 Preliminary Study. *J Hand Surg Am*. 2022.

- 290 10. Abou Arab W, Rauch A, Chawki MB, et al. Scapholunate instability: improved  
291 detection with semi-automated kinematic CT analysis during stress maneuvers. *Eur Radiol.*  
292 2018;28(10):4397-406.
- 293 11. Athlani L, Rouizi K, Granero J, et al. Assessment of scapholunate instability with  
294 dynamic computed tomography. *Journal of Hand Surgery: European Volume.*  
295 2020;45(4):375-82.
- 296 12. Rasuli B, Dixon A. Scapholunate dissociation. *Radiopaedia.org.* 2010.
- 297 13. Athlani L, Granero J, Rouizi K, et al. Four-Dimensional CT Analysis of Dorsal  
298 Intercalated Segment Instability in patients with Suspected Scapholunate Instability. *Journal*  
299 *of Wrist Surgery.* 2021;10(03):234-40.
- 300 14. van de Giessen M, Foumani M, Streekstra GJ, et al. Statistical descriptions of scaphoid  
301 and lunate bone shapes. *J Biomech.* 2010;43(8):1463-9.
- 302 15. Ahrend MD, Teunis T, Noser H, et al. 3D computational anatomy of the scaphoid and  
303 its waist for use in fracture treatment. *J Orthop Surg Res.* 2021;16(1):216.
- 304 16. Baumbach SF, Binder J, Synek A, et al. Analysis of the three-dimensional anatomical  
305 variance of the distal radius using 3D shape models. *BMC Med Imaging.* 2017;17(1):23.
- 306 17. Dunning H, van de Groes SAW, Verdonschot N, Buckens CF, Janssen D. The sensitivity  
307 of an anatomical coordinate system to anatomical variation and its effect on the description  
308 of knee kinematics as obtained from dynamic CT imaging. *Med Eng Phys.* 2022;102:103781.
- 309 18. Teule EHS, Lessmann N, van der Heijden EPA, Hummelink S. Automatic segmentation  
310 and labelling of wrist bones in four-dimensional computed tomography datasets via deep  
311 learning. *J Hand Surg Eur Vol.* 2023:17531934231209876.
- 312 19. Kroon D-J. Smooth Triangulate Mesh. *MATLAB Central File Exchange*2023.

- 313 20. de Roo MGA, Dobbe JGG, Peymani A, van der Made AD, Strackee SD, Streekstra GJ.  
314 Accuracy of manual and automatic placement of an anatomical coordinate system for the  
315 full or partial radius in 3D space. *Scientific Reports* 2020 10:1. 2020;10(1):1-9.
- 316 21. Tumer N, Hiemstra O, Schreurs Y, Kraan GA, van der Stok J, Zadpoor AA. The three-  
317 dimensional shape symmetry of the lunate and its implications. *J Hand Surg Eur Vol.*  
318 2021;46(6):587-93.
- 319 22. Galley I, Bain GI, McLean JM. Influence of Lunate Type on Scaphoid Kinematics. *The*  
320 *Journal of Hand Surgery.* 2007;32(6):842-7.
- 321 23. Bain GI, Clitherow HD, Millar S, et al. The effect of lunate morphology on the 3-  
322 dimensional kinematics of the carpus. *J Hand Surg Am.* 2015;40(1):81-9.e1.
- 323 24. Coburn JC, Upal MA, Crisco JJ. Coordinate systems for the carpal bones of the wrist.  
324 *Journal of Biomechanics.* 2007;40(1):203-9.
- 325
- 326
